# Supplementary material for: Assessing Lifetime Cancer Risk Associated with Population Exposure to PM-Bound PAHs and Carcinogenic Metals in Three Mid-Latitude Metropolitan Cities
Source: Preprints.org preprint supplement (doi:10.20944/preprints202307.1522.v1), 2023-07-21
Supplement: Supplementary file 1 [file supplementary]

Article

Assessing lifetime cancer risk associated with population exposure to PM-bound PAHs and carcinogenic metals in three mid-latitude metropolitan cities

Mohammad Aldekheel 1,2, Vahid Jalali Farahani 1 and Constantinos Sioutas 1,*

|  |
| --- |

1 Department of Civil and Environmental Engineering, University of Southern California,

Los Angeles, CA 90089, USA; aldekhee@usc.edu; jalalifa@usc.edu

2 Department of Civil Engineering, Kuwait University, P.O. Box 5969, Safat 13060, Kuwait

***** Correspondence: sioutas@usc.edu; Tel.: +1-213-740-6134; Fax: +1-213-744-1426

Supplementary information

| (a) |
| --- |
| 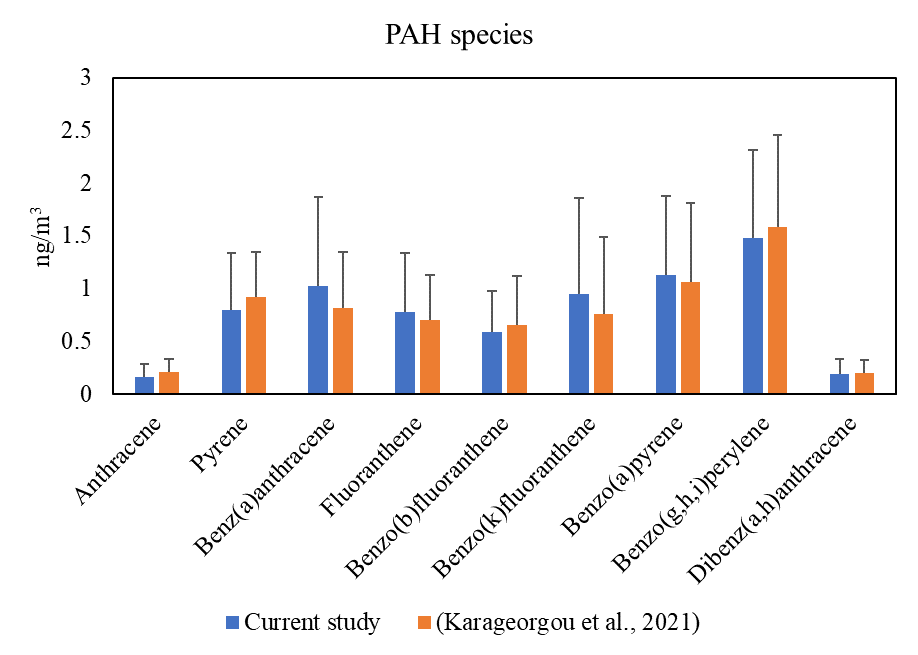 |
| (b) |
| 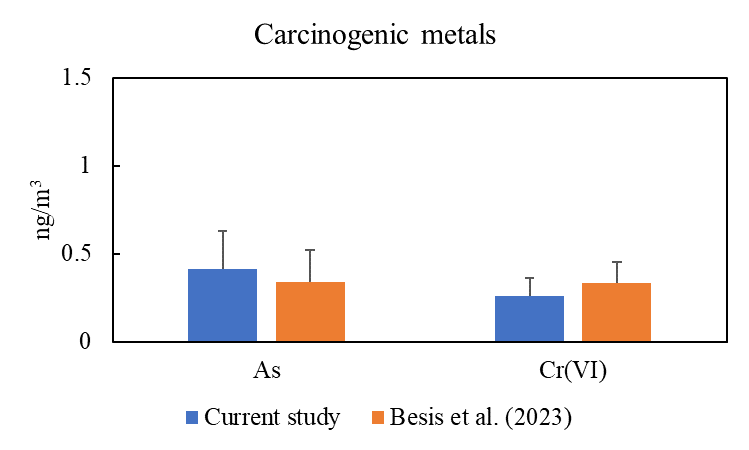 |

**Figure S1.** Comparison of (a) PAH and (b) carcinogenic metal concentrations (ng/m3) between the current study and Karageorgou et al. (2021) [75] and Besis et al. (2023) [76] studies. The concentration of Cr(VI) was obtained as 1/7 of the total Cr concentration.
